# Supplementary material for: Air Pollution and Tear Lactoferrin among Dry Eye Disease Modifications by Stress and Allergy: A Case–Control Study of Taxi Drivers
Source: MDPI journal article supplement (doi:10.3390/atmos13122003), 2022-11-29
Supplement: s1 [file s1]

# Air Pollution and Tear Lactoferrin among Dry Eye Disease Modifications by Stress and Allergy: A Case–Control Study of Taxi Drivers

Wei Hao, Fanxue Kong, Wei Song, Lei Zhang, Xueying Xu, Zhongjuan Ren, Jing Li and Fei Yu

**Table S1.** Descriptive Statistic of air pollution concentrations ( $\mu\text{g}/\text{m}^3$ ) and humidity (%) in the six cities of Liaoning, China, from 2012 to 2014 .

|                      | PM <sub>2.5</sub> | PM <sub>10</sub> | O <sub>3</sub> | SO <sub>2</sub> | CO             | NO <sub>2</sub> | Humidity    |
|----------------------|-------------------|------------------|----------------|-----------------|----------------|-----------------|-------------|
| City (mean $\pm$ SD) |                   |                  |                |                 |                |                 |             |
| Shenyang             | 92 $\pm$ 11       | 110 $\pm$ 7      | 88 $\pm$ 21    | 54 $\pm$ 8      | 1211 $\pm$ 841 | 40 $\pm$ 6      | 68 $\pm$ 8  |
| Dalian               | 80 $\pm$ 24       | 92 $\pm$ 46      | 72 $\pm$ 17    | 67 $\pm$ 3      | 1314 $\pm$ 570 | 49 $\pm$ 17     | 65 $\pm$ 10 |
| Anshan               | 101 $\pm$ 13      | 107 $\pm$ 15     | 174 $\pm$ 72   | 71 $\pm$ 22     | 2020 $\pm$ 324 | 37 $\pm$ 9      | 56 $\pm$ 8  |
| Jinzhou              | 89 $\pm$ 38       | 99 $\pm$ 52      | 108 $\pm$ 36   | 63 $\pm$ 14     | 1995 $\pm$ 628 | 43 $\pm$ 10     | 57 $\pm$ 10 |
| Benxi                | 59 $\pm$ 7        | 76 $\pm$ 11      | 45 $\pm$ 5     | 26 $\pm$ 13     | 408 $\pm$ 119  | 21 $\pm$ 15     | 64 $\pm$ 8  |
| Dandong              | 62 $\pm$ 15       | 71 $\pm$ 6       | 49 $\pm$ 21    | 24 $\pm$ 6      | 511 $\pm$ 45   | 23 $\pm$ 13     | 70 $\pm$ 11 |
| Mean $\pm$ SD        | 78 $\pm$ 19       | 83 $\pm$ 35      | 94 $\pm$ 36    | 33 $\pm$ 18     | 1197 $\pm$ 480 | 33 $\pm$ 12     | 63 $\pm$ 10 |
| Minimum              | 34                | 25               | 29             | 5               | 512            | 12              | 45          |
| P <sub>25</sub>      | 72                | 74               | 81             | 19              | 880            | 27              | 56          |
| P <sub>50</sub>      | 80                | 84               | 92             | 26              | 1080           | 31              | 64          |
| P <sub>75</sub>      | 89                | 100              | 99             | 38              | 1386           | 37              | 71          |
| Maximum              | 119               | 155              | 256            | 70              | 2433           | 61              | 90          |
| IQR*                 | 17                | 26               | 18             | 19              | 506            | 10              | 15          |
| NS†                  | 50                | 70               | 160            | 60              | 4000           | 40              | -           |
| % of >NS             | 72.2              | 69.2             | 23.3           | 21.6            | 0              | 52.5            | -           |
| WHO guideline‡       | 10                | 20               | 100            | 20              | -              | 40              | -           |
| % of >WHO            | 100               | 100              | 41.3           | 76.1            | -              | 52.5            | -           |

\*IQR: Interquartile range.

†NS: national standard. China national ambient air quality standard in 2012 [25].

‡ WHO 2021 air quality guidelines [26].

**Table S2.** Spearman correlation coefficients\* between air pollutants.

| Pollutant         | PM <sub>2.5</sub> | PM <sub>10</sub> | O <sub>3</sub> | SO <sub>2</sub> | CO      | NO <sub>2</sub> |
|-------------------|-------------------|------------------|----------------|-----------------|---------|-----------------|
| PM <sub>2.5</sub> | 1                 | 0.825            | 0.170          | 0.331           | 0.409   | 0.578           |
| PM <sub>10</sub>  |                   | 1                | 0.171          | 0.439           | 0.572   | 0.420           |
| O <sub>3</sub>    |                   |                  | 1              | - 0.261         | - 0.277 | - 0.235         |
| SO <sub>2</sub>   |                   |                  |                | 1               | 0.428   | 0.330           |
| CO                |                   |                  |                |                 | 1       | 0.367           |
| NO <sub>2</sub>   |                   |                  |                |                 |         | 1               |

\*All coefficients were statistically significant ( $p < 0.05$ ).

**Table S3.** Association of PM<sub>10</sub>, NO<sub>2</sub> or humidity (per IQR increase <sup>a</sup>) and DED, stratified by significant covariates.

|                     | <i>n</i> | PM <sub>10</sub> (26 µg/m <sup>3</sup> Increase) |                              | NO <sub>2</sub> (10 µg/m <sup>3</sup> Increase) |                              | Humidity (15% Increase) |                              |
|---------------------|----------|--------------------------------------------------|------------------------------|-------------------------------------------------|------------------------------|-------------------------|------------------------------|
|                     |          | aOR (95% CI)                                     | <i>p</i> -Value <sup>a</sup> | aOR (95% CI)                                    | <i>p</i> -Value <sup>a</sup> | aOR (95% CI)            | <i>p</i> -Value <sup>a</sup> |
| Stress events       |          |                                                  |                              |                                                 |                              |                         |                              |
| No                  | 1053     | 1.01 (0.50, 2.04)                                |                              | 1.63 (0.77, 3.47)                               |                              | 0.33 (0.17, 0.39)       |                              |
| Yes                 | 4652     | 1.89 (1.19, 3.08) *                              | 0.023                        | 2.87 (1.60, 3.58) **                            | 0.003                        | 0.51 (0.38, 0.64) *     | 0.039                        |
| Allergic tendencies |          |                                                  |                              |                                                 |                              |                         |                              |
| No                  | 3688     | 1.12 (0.31, 2.01)                                |                              | 1.23 (0.56, 2.68)                               |                              | 0.39 (0.19, 0.59)       |                              |
| Yes                 | 2038     | 1.77 (1.06, 2.90) *                              | 0.038                        | 2.93 (1.64, 3.83) **                            | 0.002                        | 0.49 (0.11, 0.84) **    | 0.010                        |
| Self-employed       |          |                                                  |                              |                                                 |                              |                         |                              |
| No                  | 5263     | 0.95 (0.37, 1.52)                                |                              | 1.39 (0.49, 3.94)                               |                              | 0.47 (0.11, 0.93)       |                              |
| Yes                 | 443      | 0.94 (0.59, 1.59)                                | 0.415                        | 1.40 (0.78, 2.53)                               | 0.098                        | 0.52 (0.23, 1.02)       | 0.108                        |
| Shift drivers       |          |                                                  |                              |                                                 |                              |                         |                              |
| Day-time            | 2999     | 1.11 (0.69, 1.78)                                |                              | 1.40 (0.64, 2.83)                               |                              | 0.63 (0.42, 1.14)       |                              |
| Night-time          | 2709     | 1.06 (0.92, 1.21)                                | 0.870                        | 1.79 (0.54, 3.42)                               | 0.553                        | 0.58 (0.34, 1.08)       | 0.316                        |

<sup>a</sup> *p*-Value are presented as hypothetical test of likelihood ratio test to compare model fit including or excluding interactive items. \* *p* < 0.05. \*\* *p* < 0.01.
